# Supplementary material
Source: Springer Nature journal article supplement (https://www.springermedizin.de/resource/supplementary/12889_2013_6848_MOESM4_ESM.pdf/9499160)
Supplement: MOESM4 [file 9499160]

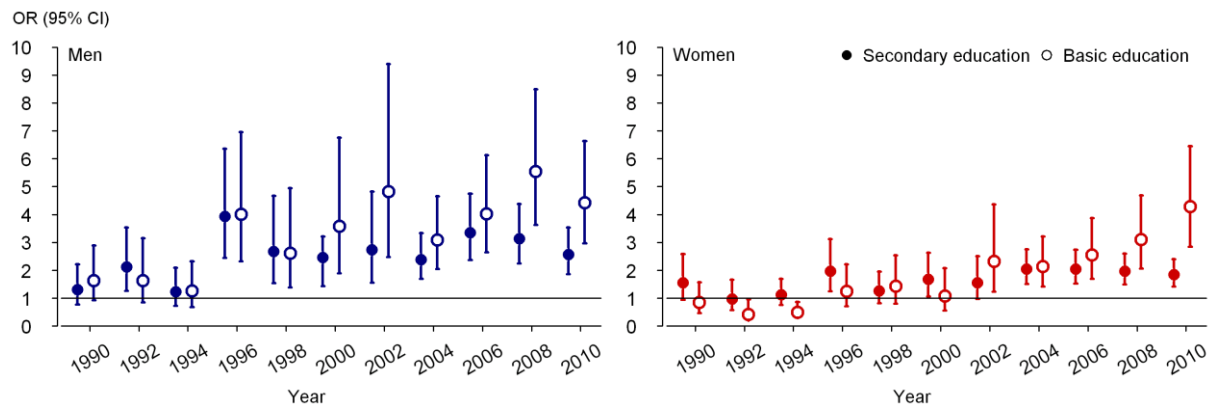

**Figure 4.** Odds ratios of smoking among 20–64-year-old men and women with basic and secondary education compared to men and women with higher education in Estonia, 1990–2010.
